# Supplementary material
Source: PubMed Central journal article supplement (PMC8380691)
Supplement: NIHMS1703989-supplement-1.pdf [file NIHMS1703989-supplement-1.pdf]

## SUPPLEMENTARY MATERIALS

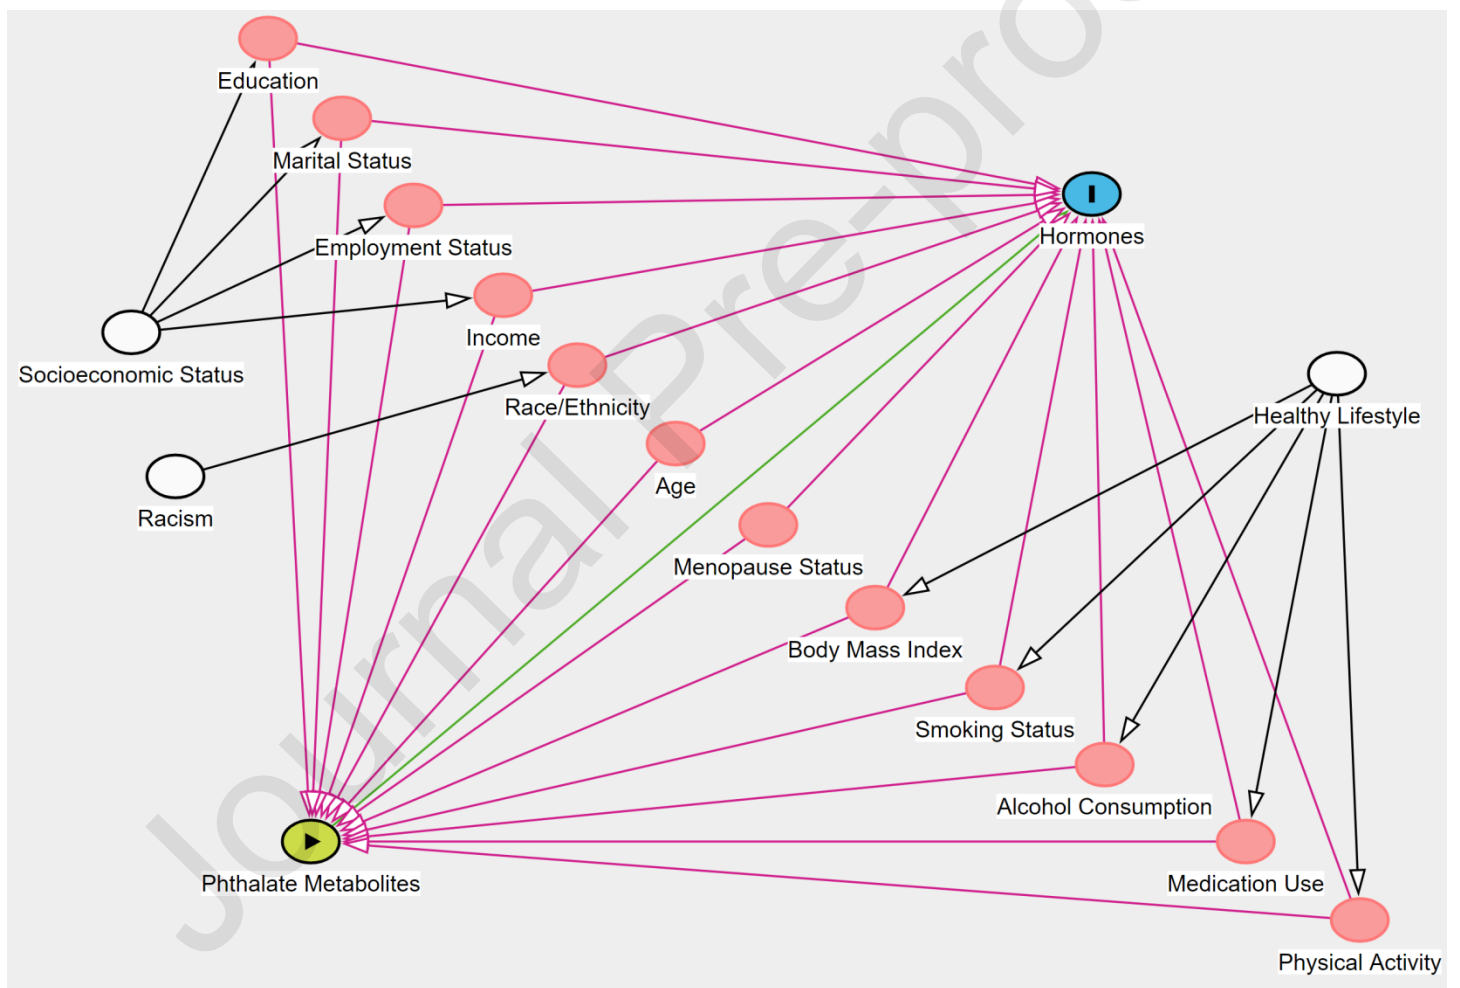

**Supplemental Figure 1. Directed acyclic graph for associations of phthalates with hormones.** Green circle represents the exposure (i.e. phthalates), while the blue circle represents the outcome (i.e. hormones). White circles represent latent variables (i.e. socioeconomic status, racism, and healthy lifestyle), while red circles

represent confounding variables that were measured in MWHS and included as covariates in final statistical analyses.

**Supplemental Table 1. Quartile associations of phthalate metabolites with hormones (n=718).**

| Exposure                     | Estradiol               | Testosterone               | Progesterone            | SHBG               | FSH                     | AMH                     |
|------------------------------|-------------------------|----------------------------|-------------------------|--------------------|-------------------------|-------------------------|
| % change in hormones (95%CI) |                         |                            |                         |                    |                         |                         |
| <b>MCPP</b>                  |                         |                            |                         |                    |                         |                         |
| Q2 (ref = Q1)                | 4.0 (-8.5, 18.3)        | 2.9 (-10.0, 17.8)          | -10.3 (-26.1, 8.8)      | 0.8 (-9.0, 11.8)   | 9.3 (-12.9, 37.1)       | 0.4 (-16.2, 20.4)       |
| Q3 (ref = Q1)                | 3.9 (-8.6, 18.1)        | 2.2 (-10.7, 16.9)          | 1.1 (-16.7, 22.6)       | -8.1 (-17.1, 1.8)  | 5.2 (-16.2, 31.9)       | 9.7 (-8.5, 31.4)        |
| Q4 (ref = Q1)                | 7.1 (-5.8, 21.7)        | 3.3 (-9.7, 18.2)           | 4.7 (-13.7, 26.9)       | -3.5 (-12.9, 7.0)  | -1.6 (-21.5, 23.5)      | 16.3 (-3.0, 39.3)       |
| <i>P</i> linear trend        | 0.97                    | 0.76                       | 0.86                    | 0.28               | 0.24                    | 0.85                    |
| <b>MBzP</b>                  |                         |                            |                         |                    |                         |                         |
| Q2 (ref = Q1)                | 0.7 (-11.5, 14.7)       | -7.5 (-19.3, 5.9)          | -5.1 (-21.9, 15.3)      | 3.2 (-7.0, 14.5)   | 5.8 (-15.8, 33.0)       | 7.4 (-10.6, 29.0)       |
| Q3 (ref = Q1)                | 11.6 (-1.9, 26.9)       | -11.5 (-22.7, 1.3)         | 6.2 (-12.5, 29.0)       | 8.8 (-1.9, 20.7)   | -11.1 (-29.2, 11.6)     | 6.8 (-11.0, 28.1)       |
| Q4 (ref = Q1)                | 3.4 (-9.3, 17.9)        | -3.1 (-15.5, 11.2)         | 5.2 (-13.7, 28.2)       | 5.1 (-5.4, 16.8)   | -7.8 (-26.9, 16.3)      | 17.9 (-2.1, 41.9)       |
| <i>P</i> linear trend        | 0.99                    | 0.69                       | 0.20                    | 0.81               | 0.37                    | 0.70                    |
| <b>ΣDEHP</b>                 |                         |                            |                         |                    |                         |                         |
| Q2 (ref = Q1)                | -7.0 (-18.2, 5.7)       | <b>-13.1 (-24.0, -0.5)</b> | -2.1 (-19.3, 18.9)      | -7.0 (-16.1, 3.2)  | 4.0 (-17.2, 30.6)       | 9.8 (-8.5, 31.7)        |
| Q3 (ref = Q1)                | 4.6 (-8.0, 18.9)        | -8.0 (-19.6, 5.2)          | -6.4 (-22.9, 13.5)      | 8.6 (-2.0, 20.4)   | 3.8 (-17.3, 30.2)       | 11.5 (-7.0, 33.8)       |
| Q4 (ref = Q1)                | 9.8 (-3.6, 25.0)        | -4.3 (-16.4, 9.7)          | 13.2 (-6.9, 37.7)       | -1.3 (-11.0, 9.6)  | -10.9 (-29.2, 12.2)     | 9.5 (-8.9, 31.7)        |
| <i>P</i> linear trend        | 0.08                    | 0.28                       | 0.02                    | 0.34               | 0.80                    | 0.22                    |
| <b>ΣPlastics</b>             |                         |                            |                         |                    |                         |                         |
| Q2 (ref = Q1)                | 3.0 (-9.4, 17.1)        | -9.8 (-21.2, 3.2)          | 2.0 (-15.9, 23.7)       | 4.6 (-5.7, 16.0)   | -4.4 (-23.8, 20.0)      | -3.0 (-19.1, 16.3)      |
| Q3 (ref = Q1)                | 0.9 (-11.2, 14.8)       | -9.6 (-21.0, 3.4)          | -3.8 (-20.7, 16.7)      | 9.0 (-1.7, 20.9)   | 6.7 (-14.9, 33.9)       | 11.2 (-7.3, 33.4)       |
| Q4 (ref = Q1)                | 13.4 (-0.5, 29.2)       | -4.7 (-16.9, 9.3)          | 21.3 (-0.3, 47.5)       | 2.7 (-7.6, 14.0)   | -18.4 (-35.1, 2.8)      | 12.5 (-6.4, 35.3)       |
| <i>P</i> linear trend        | 0.09                    | 0.26                       | 0.01                    | 0.38               | 0.64                    | 0.20                    |
| <b>MEP</b>                   |                         |                            |                         |                    |                         |                         |
| Q2 (ref = Q1)                | 4.5 (-8.1, 18.9)        | 9.4 (-4.4, 25.2)           | 2.9 (-15.3, 24.9)       | 4.1 (-6.1, 15.5)   | 0.4 (-20.0, 26.0)       | -8.9 (-24.1, 9.3)       |
| Q3 (ref = Q1)                | -8.1 (-19.4, 4.8)       | <b>14.7 (0.0, 31.6)</b>    | 12.1 (-8.0, 36.7)       | 10.0 (-1.1, 22.2)  | <b>31.3 (4.1, 65.5)</b> | -12.7 (-27.5, 5.2)      |
| Q4 (ref = Q1)                | -2.0 (-14.5, 12.4)      | 1.9 (-11.7, 17.6)          | 15.3 (-6.2, 41.6)       | 6.0 (-5.1, 18.3)   | 17.1 (-8.0, 48.9)       | -7.8 (-24.0, 11.8)      |
| <i>P</i> linear trend        | 0.58                    | 0.81                       | 0.10                    | 0.86               | 0.88                    | 0.86                    |
| <b>MBP</b>                   |                         |                            |                         |                    |                         |                         |
| Q2 (ref = Q1)                | -2.8 (-14.6, 10.6)      | -5.7 (-17.6, 7.9)          | -3.5 (-20.5, 17.3)      | 3.9 (-6.3, 15.3)   | -3.7 (-23.3, 21.0)      | <b>23.1 (2.6, 47.7)</b> |
| Q3 (ref = Q1)                | -0.5 (-12.6, 13.2)      | -1.0 (-13.5, 13.3)         | 3.4 (-14.8, 25.6)       | -0.5 (-10.3, 10.4) | -4.6 (-24.1, 19.8)      | 10.5 (-7.9, 32.5)       |
| Q4 (ref = Q1)                | -0.6 (-12.6, 13.1)      | 7.6 (-5.9, 23.1)           | 9.4 (-9.8, 32.8)        | 6.7 (-3.8, 18.3)   | -12.4 (-30.2, 9.9)      | <b>19.9 (0.1, 43.7)</b> |
| <i>P</i> linear trend        | 0.78                    | 0.14                       | 0.90                    | 0.80               | 0.37                    | 0.09                    |
| <b>MiBP</b>                  |                         |                            |                         |                    |                         |                         |
| Q2 (ref = Q1)                | 8.6 (-4.4, 23.5)        | <b>18.5 (3.7, 35.5)</b>    | 10.0 (-9.3, 33.4)       | 5.1 (-5.2, 16.5)   | -4.0 (-23.5, 20.3)      | 10.0 (-8.2, 31.9)       |
| Q3 (ref = Q1)                | 2.0 (-10.4, 16.2)       | 8.8 (-4.9, 24.5)           | 11.8 (-8.0, 35.9)       | -2.5 (-12.2, 8.2)  | -15.4 (-32.7, 6.4)      | 11.5 (-7.2, 33.9)       |
| Q4 (ref = Q1)                | 9.2 (-4.2, 24.5)        | <b>23.0 (7.3, 41.0)</b>    | 14.4 (-6.1, 39.3)       | 8.6 (-2.2, 20.7)   | -3.1 (-23.1, 22.2)      | 6.7 (-11.3, 28.5)       |
| <i>P</i> linear trend        | 0.02                    | 0.05                       | 0.24                    | 0.50               | 0.66                    | 0.22                    |
| <b>ΣPCP</b>                  |                         |                            |                         |                    |                         |                         |
| Q2 (ref = Q1)                | -3.0 (-14.7, 10.4)      | 3.2 (-9.8, 18.1)           | 6.3 (-12.5, 29.0)       | 5.1 (-5.2, 16.6)   | 3.0 (-18.0, 29.3)       | -7.8 (-23.2, 10.6)      |
| Q3 (ref = Q1)                | -4.7 (-16.3, 8.6)       | 13.2 (-1.2, 29.7)          | 12.5 (-7.5, 36.8)       | 10.3 (-0.6, 22.5)  | 11.8 (-11.1, 40.6)      | -6.5 (-22.2, 12.3)      |
| Q4 (ref = Q1)                | -0.6 (-13.2, 13.8)      | 2.0 (-11.5, 17.6)          | 21.6 (-0.9, 49.1)       | 8.3 (-2.9, 20.8)   | 20.6 (-5.1, 53.2)       | -6.1 (-22.5, 13.8)      |
| <i>P</i> linear trend        | 0.52                    | 0.74                       | 0.10                    | 0.85               | 0.80                    | 0.98                    |
| <b>ΣPhthalates</b>           |                         |                            |                         |                    |                         |                         |
| Q2 (ref = Q1)                | 3.2 (-9.2, 17.5)        | 7.8 (-5.9, 23.4)           | 14.3 (-5.9, 38.7)       | 0.8 (-9.2, 11.8)   | -5.9 (-25.1, 18.2)      | 2.4 (-14.7, 23.0)       |
| Q3 (ref = Q1)                | -4.2 (-15.8, 9.0)       | 6.4 (-7.1, 21.8)           | 4.1 (-14.3, 26.4)       | 4.4 (-6.0, 15.8)   | -5.8 (-25.0, 18.4)      | 5.6 (-12.1, 26.8)       |
| Q4 (ref = Q1)                | 9.3 (-4.3, 24.9)        | 3.7 (-9.8, 19.2)           | <b>24.4 (1.8, 51.9)</b> | 3.6 (-6.9, 15.3)   | 7.1 (-15.4, 35.4)       | 5.3 (-12.8, 27.1)       |
| <i>P</i> linear trend        | 0.39                    | 0.85                       | 0.05                    | 0.94               | 0.76                    | 0.85                    |
| <b>ΣAA</b>                   |                         |                            |                         |                    |                         |                         |
| Q2 (ref = Q1)                | 5.2 (-7.4, 19.5)        | -6.3 (-18.0, 7.1)          | 1.8 (-16.0, 23.3)       | -0.4 (-10.1, 10.4) | -7.0 (-25.8, 16.6)      | 15.9 (-3.3, 38.8)       |
| Q3 (ref = Q1)                | 12.2 (-1.2, 27.5)       | -1.3 (-13.7, 12.8)         | 15.0 (-5.1, 39.3)       | 6.1 (-4.3, 17.6)   | -16.3 (-33.2, 4.9)      | <b>20.7 (0.7, 44.6)</b> |
| Q4 (ref = Q1)                | <b>18.7 (4.3, 35.0)</b> | 4.2 (-9.0, 19.3)           | <b>26.1 (3.8, 53.2)</b> | 7.1 (-3.5, 18.8)   | -17.3 (-34.2, 4.0)      | 12.5 (-6.3, 35.1)       |
| <i>P</i> linear trend        | 0.07                    | 0.79                       | 0.04                    | 0.50               | 0.36                    | 0.03                    |

Data are presented as the % change in hormones in phthalate quartile 2 (Q2), 3 (Q3), and 4 (Q4) compared to quartile 1. Linear regression models adjusted for age, race/ethnicity, employment status, education, income, marital status, alcohol consumption, smoking status, physical activity, medication use, menopausal status, and BMI. CI, confidence interval; AMH, anti-Mullerian hormone; BMI, body mass index; FSH, follicle stimulating hormone; SHBG, sex hormone binding globulin.
